# Supplementary material for: Extension of a gaseous dry deposition algorithm to oxidized volatile organic compounds and hydrogen cyanide for application in chemistry transport models
Source: Copernicus journal article supplement (doi:10.5194/gmd-14-5093-2021), 2021-08-16
Supplement: Supplementary file [file gmd-14-5093-2021-supplement.pdf]

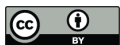

*Supplement of*

**Extension of a gaseous dry deposition algorithm to oxidized volatile organic compounds and hydrogen cyanide for application in chemistry transport models**

**Zhiyong Wu et al.**

*Correspondence to:* Leiming Zhang (leiming.zhang@canada.ca)

The copyright of individual parts of the supplement might differ from the article licence.

Table S1. Henry's Law ( $H$ ) and effective Henry's Law ( $H^*$ ) values for oVOCs and HCN

| Compound         | $H$ (M atm <sup>-1</sup> ) [a] | $H$ for surrogate species if available (M atm <sup>-1</sup> ) [b]                                                                      | $H$ (M atm <sup>-1</sup> ) [c] | $H^*$ (M atm <sup>-1</sup> ) [d]                                                                                                                                                 |
|------------------|--------------------------------|----------------------------------------------------------------------------------------------------------------------------------------|--------------------------------|----------------------------------------------------------------------------------------------------------------------------------------------------------------------------------|
| HMHP             | $1.3 \times 10^6$              | $1.72 \times 10^6$                                                                                                                     | $1.72 \times 10^6$             | $H^*=H$ [e]                                                                                                                                                                      |
| HAC              | $2 \times 10^3$                | $7.80 \times 10^3$                                                                                                                     | $7.80 \times 10^3$             | $H^*=H$                                                                                                                                                                          |
| PAA              | $5.2 \times 10^2$              | $8.41 \times 10^2$                                                                                                                     | $8.41 \times 10^2$             | Assuming same dissociation as acetic acid ( $K = 1.75 \times 10^{-5}$ M);<br>$H^* = 8.41 \times 10^2 \left\{ 1 + \frac{K}{[H^+]} \right\} = 1.48 \times 10^5$                    |
| HDC <sub>4</sub> | $2 \times 10^3$                | $7.4 \times 10^1$ (2,3-butanedione)<br>$1.22 \times 10^2$ (butanol)                                                                    | $1.22 \times 10^2$             | $H^*=H$                                                                                                                                                                          |
| DHC <sub>4</sub> | $2 \times 10^3$                | $2.1 \times 10^5$ (1,2-butanediol)                                                                                                     | $2.1 \times 10^5$              | $H^*=H$                                                                                                                                                                          |
| HPALD            | $4 \times 10^4$                | $1.32 \times 10^{-2}$ (isoprene),<br>$6.28 \times 10^1$ (tert-butyl hydroperoxide)                                                     | $6.28 \times 10^1$             | $H^*=H$                                                                                                                                                                          |
| ISOPOOH          | $7 \times 10^7$                | $4.46 \times 10^5$ (bis-(hydroxymethyl)-peroxide)<br>$1.76 \times 10^6$ (hydroxymethyl hydroperoxide)                                  | $1.76 \times 10^6$             | $H^*=H$                                                                                                                                                                          |
| IEPOX            | $7 \times 10^7$                | $1.93 \times 10^9$ to $9.73 \times 10^{10}$ [f]                                                                                        | $1.93 \times 10^9$ [g]         | $H^*=H$                                                                                                                                                                          |
| PROPNN           | $1 \times 10^4$                | $1.01 \times 10^3$ (1-nitrooxy-2-propanone)                                                                                            | $1.01 \times 10^3$             | $H^*=H$                                                                                                                                                                          |
| ISOPN            | $5 \times 10^3$                | $8.92 \times 10^3$ (2-nitroxy-1-butanol)<br>$3.65 \times 10^4$ (5-nitrooxy-2-pentanol)                                                 | $3.65 \times 10^4$             | $H^*=H$                                                                                                                                                                          |
| MACN             | $6 \times 10^3$                | $3.65 \times 10^4$ (5-nitrooxy-2-pentanol)<br>$9.02 \times 10^3$ (2-nitrooxy-1-butanol)<br>$1.01 \times 10^3$ (1-nitrooxy-2-propanone) | $3.65 \times 10^4$             | $H^*=H$                                                                                                                                                                          |
| MVKN             | $6 \times 10^3$                | $3.65 \times 10^4$ (5-nitrooxy-2-pentanol)<br>$9.02 \times 10^3$ (2-nitrooxy-1-butanol)<br>$1.01 \times 10^3$ (1-nitrooxy-2-propanone) | $3.65 \times 10^4$             | $H^*=H$                                                                                                                                                                          |
| INP              | $5 \times 10^3$                | $6.28 \times 10^1$ (tert-butyl hydroperoxide)<br>$3.65 \times 10^4$ (5-nitroxy-2-pentanal)                                             | $3.65 \times 10^4$             | $H^*=H$                                                                                                                                                                          |
| MTNP             | $1 \times 10^3$                | $2.13 \times 10^4$ (1-methyl-1-phenylethylhydroperoxide)                                                                               | $2.13 \times 10^4$             | $H^*=H$                                                                                                                                                                          |
| HCN              | $1 \times 10^1$                | $1.72 \times 10^1$                                                                                                                     | $1.72 \times 10^1$             | $\text{HCN (aq)} \rightleftharpoons \text{H}^+ + \text{CN}^-$ ( $K = 6.2 \times 10^{-10}$ M)<br>$H^* = 1.72 \times 10^1 \left\{ 1 + \frac{K}{[H^+]} \right\} = 1.73 \times 10^1$ |

[a] Data listed in Nguyen et al. (2015) which is mostly based on Sander (1999).

[b] Data from Sander (2015); The unit conversion was taken using  $1 \text{ mol m}^{-3} \text{ Pa}^{-1} = 101.325 \text{ M atm}^{-1}$ .

[c] Larger value of the surrogates is chosen.

[d]  $H^* = H \left( 1 + \frac{K}{[H^+]} \right)$ ,  $[H^+] = 1 \times 10^{-7} \text{ M}$ .

[e] Note that pKa (=  $-\log_{10}K_a$ ) for alcohols ranges from 15.5 for methanol to 18.3 for 3-pentanol. If methanol is assumed, then  $K_a = 3.16 \times 10^{-16}$ , so very small contribution to  $H$  law and this contribution decreases with increasing molecular mass.

[f] Chemical structures for these compounds follow Chan et al. (2010).

[g] Note that Sander (2015) noted a higher degree of uncertainty associated with this value.

Table S2. Oxidizing capacities for oVOCs and HCN calculated using the methods described in Reid et al. (1987)

| Compound         | $\Delta G_f$ for species (J/mol)<br>[a] | Example Redox Reaction.<br>W Reactant + X H(+) + X e <sup>-</sup> → Y CH <sub>4</sub> (g) + Z H <sub>2</sub> O<br>$\Delta G_{f,CH_4} = -5.087 \times 10^4$ , $\Delta G_{f,H_2O} = -2.288 \times 10^5$ , $\Delta G_{f,N_2} = 0$ | Resulting $\Delta G_f$<br>for the reaction<br>(J/mol) | $pe^0$ [b] | $n_H$ [c] | $pe^0(W)$ [d] |
|------------------|-----------------------------------------|--------------------------------------------------------------------------------------------------------------------------------------------------------------------------------------------------------------------------------|-------------------------------------------------------|------------|-----------|---------------|
| HMHP             | $-3.9078 \times 10^5$                   | HMHP + 6 H(+) + 6 e <sup>-</sup> → CH <sub>4</sub> (g) + 3 H <sub>2</sub> O                                                                                                                                                    | $-3.465 \times 10^5$                                  | 10.134     | 6         | 3.13          |
| HAC              | $-3.4524 \times 10^5$                   | HAC + 10 H(+) + 10 e <sup>-</sup> → 3 CH <sub>4</sub> (g) + 2 H <sub>2</sub> O                                                                                                                                                 | $-2.650 \times 10^5$                                  | 4.650      | 10        | -2.35         |
| PAA              | $-3.8023 \times 10^5$                   | PAA + 10 H(+) + 10 e <sup>-</sup> → 2 CH <sub>4</sub> (g) + 3 H <sub>2</sub> O                                                                                                                                                 | $-4.079 \times 10^5$                                  | 7.158      | 10        | 0.16          |
| HDC <sub>4</sub> | $-4.6574 \times 10^5$                   | HDC <sub>4</sub> + 16 H(+) + 16 e <sup>-</sup> → 4 CH <sub>4</sub> (g) + 3 H <sub>2</sub> O                                                                                                                                    | $-4.241 \times 10^5$                                  | 4.652      | 16        | -2.35         |
| DHC <sub>4</sub> | $-4.7608 \times 10^5$                   | DHC <sub>4</sub> + 12 H(+) + 12 e <sup>-</sup> → 4 CH <sub>4</sub> (g) + 3 H <sub>2</sub> O                                                                                                                                    | $-4.138 \times 10^5$                                  | 6.051      | 12        | -0.95         |
| HPALD            | $-2.4813 \times 10^5$                   | HPALD + 18 H(+) + 18 e <sup>-</sup> → 5 CH <sub>4</sub> (g) + 3 H <sub>2</sub> O                                                                                                                                               | $-6.926 \times 10^5$                                  | 6.753      | 18        | -0.25         |
| ISOPOOH          | $-2.8025 \times 10^5$                   | ISOPOOH + 16 H(+) + 16 e <sup>-</sup> → 5 CH <sub>4</sub> (g) + 3 H <sub>2</sub> O                                                                                                                                             | $-6.605 \times 10^5$                                  | 7.244      | 16        | 0.24          |
| IEPOX            | $-3.7487 \times 10^5$                   | IEPOX + 16 H(+) + 16 e <sup>-</sup> → 5 CH <sub>4</sub> (g) + 3 H <sub>2</sub> O                                                                                                                                               | $-5.659 \times 10^5$                                  | 6.207      | 16        | -0.79         |
| PROPNN           | $-2.7787 \times 10^5$                   | PROPNN + 15 H(+) + 15 e <sup>-</sup> → 3 CH <sub>4</sub> (g) + 4 H <sub>2</sub> O                                                                                                                                              | $-7.899 \times 10^5$                                  | 9.242      | 15        | 2.24          |
| ISOPN            | $-1.9208 \times 10^5$                   | DHC <sub>4</sub> + 19 H(+) + 19 e <sup>-</sup> → 5 CH <sub>4</sub> (g) + 4 H <sub>2</sub> O                                                                                                                                    | $-9.775 \times 10^5$                                  | 9.028      | 19        | 2.03          |
| MACN             | $-3.7405 \times 10^5$                   | MACN + 19 H(+) + 19 e <sup>-</sup> → 4 CH <sub>4</sub> (g) + 5 H <sub>2</sub> O                                                                                                                                                | $-9.561 \times 10^5$                                  | 8.831      | 19        | 1.83          |
| MVKN             | $-4.0871 \times 10^5$                   | MVKN + 19 H(+) + 19 e <sup>-</sup> → 4 CH <sub>4</sub> (g) + 5 H <sub>2</sub> O                                                                                                                                                | $-9.561 \times 10^5$                                  | 8.831      | 19        | 1.83          |
| INP              | $-3.0226 \times 10^5$                   | INP + 21 H(+) + 21 e <sup>-</sup> → 5 CH <sub>4</sub> (g) + 5 H <sub>2</sub> O                                                                                                                                                 | $-1.096 \times 10^5$                                  | 9.160      | 21        | 2.16          |
| MTNP             | $-2.4833 \times 10^5$                   | MTNP + 34 H(+) + 34 e <sup>-</sup> → 10 CH <sub>4</sub> (g) + 5 H <sub>2</sub> O                                                                                                                                               | $-1.404 \times 10^6$                                  | 7.249      | 34        | 0.25          |
| HCN              | $+1.202 \times 10^5$                    | 2 HCN + 6 H(+) + 6 e <sup>-</sup> → 2 CH <sub>4</sub> (g) + N <sub>2</sub> (g)                                                                                                                                                 | $-3.421 \times 10^5$                                  | 10.007     | 6         | 3.01          |

[a] The  $\Delta G_f$  value for HCN was based on observations presented in Reid et al. (1987). Remaining values were calculated using the Joback group method as described in Reid et al. (1987).

[b]  $pe^0$  is the logarithm of the electron activity of the reaction,  $pe^0 = -\Delta G_f / (2.3RT)$ , where  $R = 8.314 \text{ J mol}^{-1} \text{ K}^{-1}$ , and  $T = \text{temperature (K)}$ , defined as 298K here.

[c]  $n_H$  is the number of hydrogen atoms in the redox reaction.

[d]  $pe^0(W)$  is the value of  $pe^0$  at a pH of 7;  $pe^0(W) = pe^0 - n_H 7$ .

Table S3. Mean and median values of the observation-based residual conductance ( $G_{residual}$ ) and the modeled non-stomatal conductance ( $G_{ns}$ ) under different conditions ( $\text{cm s}^{-1}$ ).

| Compound         | Nighttime dry surface            |      |                  |      | Nighttime wet surface            |      |                  |      | Daytime dry surface              |      |                  |      |
|------------------|----------------------------------|------|------------------|------|----------------------------------|------|------------------|------|----------------------------------|------|------------------|------|
|                  | observation-based $G_{residual}$ |      | modeled $G_{ns}$ |      | observation-based $G_{residual}$ |      | modeled $G_{ns}$ |      | observation-based $G_{residual}$ |      | modeled $G_{ns}$ |      |
|                  | median                           | mean | median           | mean | median                           | mean | median           | mean | median                           | mean | median           | mean |
| HMHP             | 0.10                             | 0.13 | 0.42             | 0.48 | 0.29                             | 0.30 | 1.02             | 1.03 | 7.17                             | 8.73 | 1.05             | 1.02 |
| HAC              | 0.09                             | 0.11 | 0.15             | 0.18 | 0.20                             | 0.32 | 0.36             | 0.37 | 0.75                             | 0.94 | 0.44             | 0.43 |
| PAA              | 0.13                             | 0.16 | 0.19             | 0.22 | 0.23                             | 0.25 | 0.46             | 0.46 | 3.48                             | 4.09 | 0.55             | 0.55 |
| HDC <sub>4</sub> | 0.08                             | 0.09 | 0.08             | 0.10 | 0.46                             | 0.54 | 0.21             | 0.22 | 0.72                             | 0.76 | 0.30             | 0.29 |
| DHC <sub>4</sub> | 0.11                             | 0.13 | 0.16             | 0.19 | 0.18                             | 0.21 | 0.40             | 0.40 | 0.61                             | 0.70 | 0.47             | 0.45 |
| HPALD            | 0.08                             | 0.11 | 0.15             | 0.18 | 0.22                             | 0.32 | 0.36             | 0.37 | 3.28                             | 3.53 | 0.44             | 0.43 |
| ISOPOOH/IEPOX    | 0.10                             | 0.11 | 0.39             | 0.44 | 0.36                             | 0.31 | 0.97             | 0.98 | 3.41                             | 3.70 | 0.99             | 0.96 |
| PROPNN           | 0.14                             | 0.16 | 0.15             | 0.18 | 0.23                             | 0.36 | 0.36             | 0.37 | 1.66                             | 1.70 | 0.44             | 0.43 |
| ISOPN            | 0.16                             | 0.18 | 0.15             | 0.18 | 0.34                             | 0.45 | 0.36             | 0.37 | 1.40                             | 1.49 | 0.44             | 0.43 |
| MACN/MVKN        | 0.14                             | 0.18 | 0.15             | 0.18 | 0.49                             | 0.62 | 0.36             | 0.37 | 1.21                             | 1.26 | 0.44             | 0.43 |
| INP              | 0.09                             | 0.10 | 0.15             | 0.18 | 0.46                             | 0.46 | 0.36             | 0.37 | 1.24                             | 1.25 | 0.44             | 0.43 |
| MTNP             | 0.08                             | 0.08 | 0.15             | 0.18 | 0.31                             | 0.39 | 0.36             | 0.37 | 0.50                             | 0.62 | 0.44             | 0.43 |
| HCN              | 0.01                             | 0.01 | 0.01             | 0.01 | 0.04                             | 0.04 | 0.01             | 0.01 | 0.04                             | 0.04 | 0.04             | 0.04 |
| HCOOH            | 0.12                             | 0.12 | 0.16             | 0.18 | 0.19                             | 0.25 | 0.40             | 0.41 | 0.46                             | 0.53 | 0.47             | 0.45 |

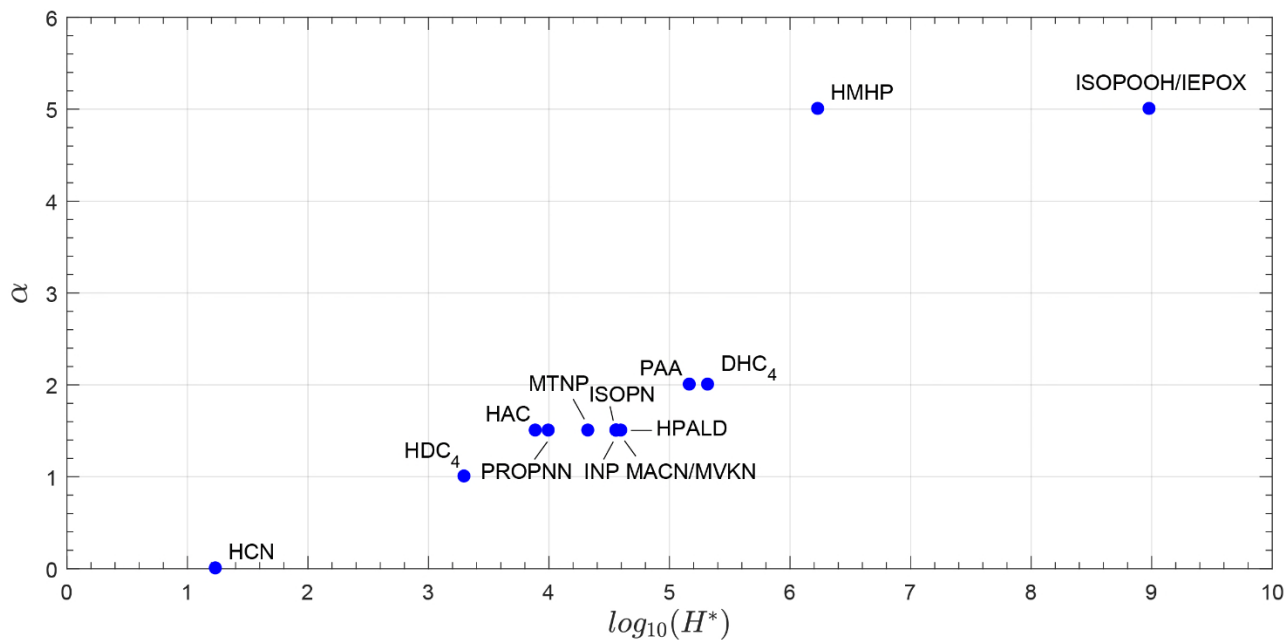

Figure S1. The chosen model parameter ( $\alpha$ ) versus literature reported maximum effective Henry's Law ( $H^*$ ) values for oVOCs and HCN considered in the present study.

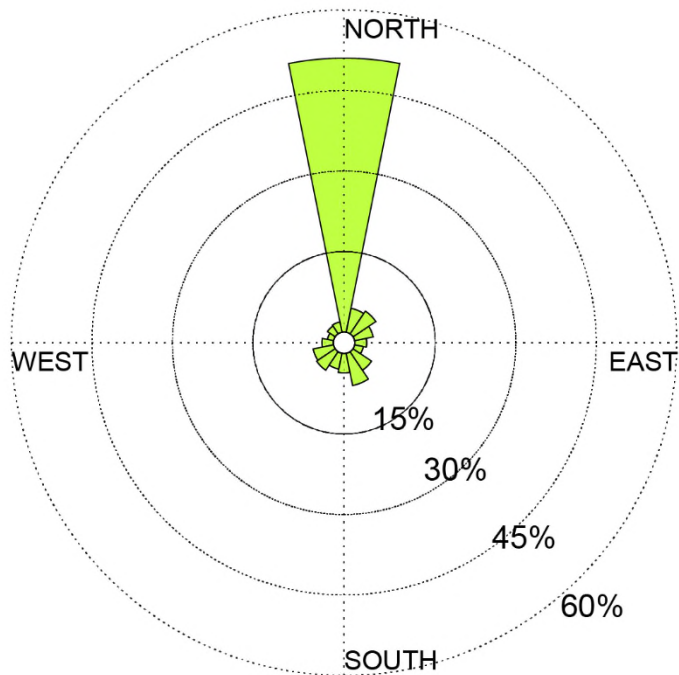

Figure S2. Windrose at the CTR site during the study period.

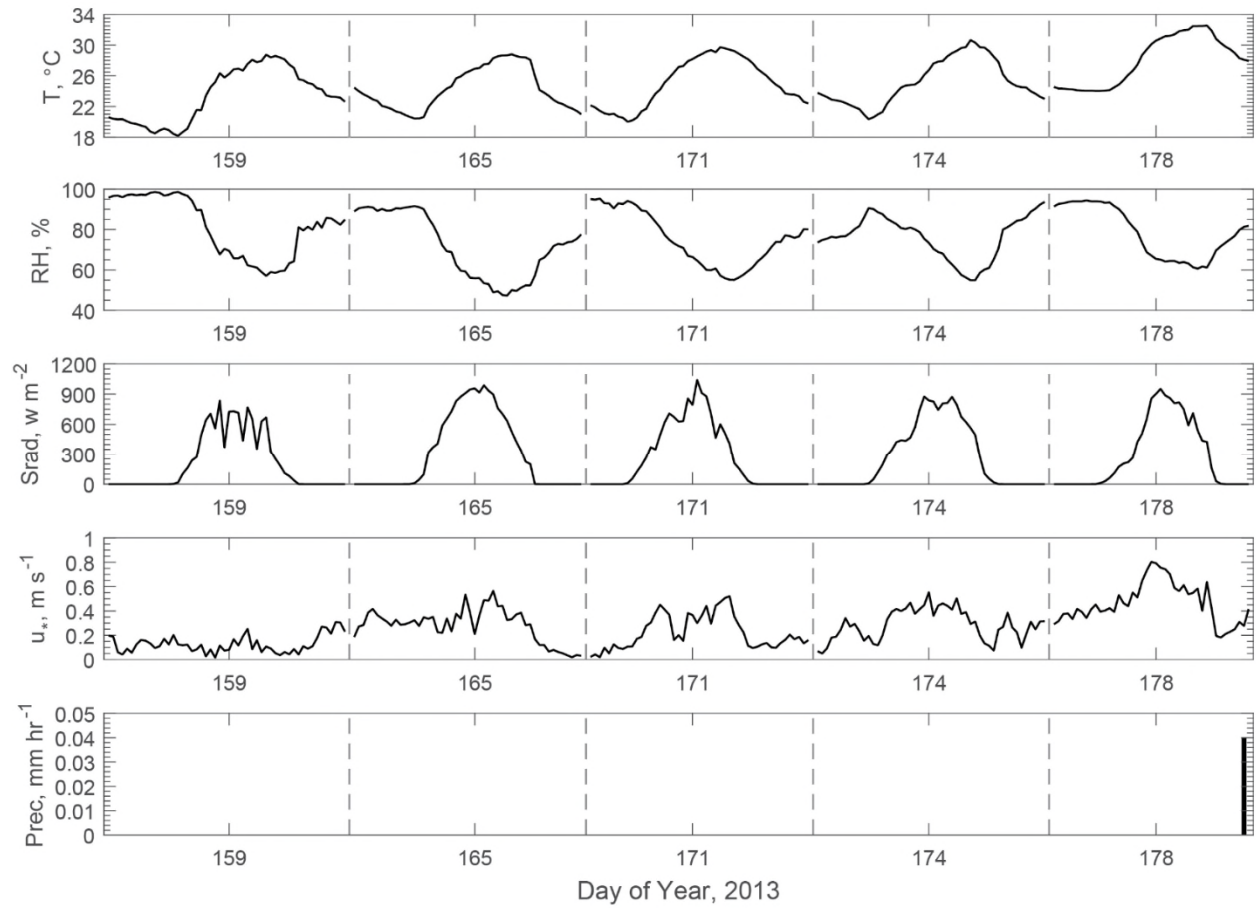

Figure S3. Meteorological parameters at the CTR site during the study period, including temperature ( $T$ ), relative humidity ( $RH$ ), solar radiation ( $Srad$ ), friction velocity ( $u_*$ ), and precipitation ( $Prec$ ).

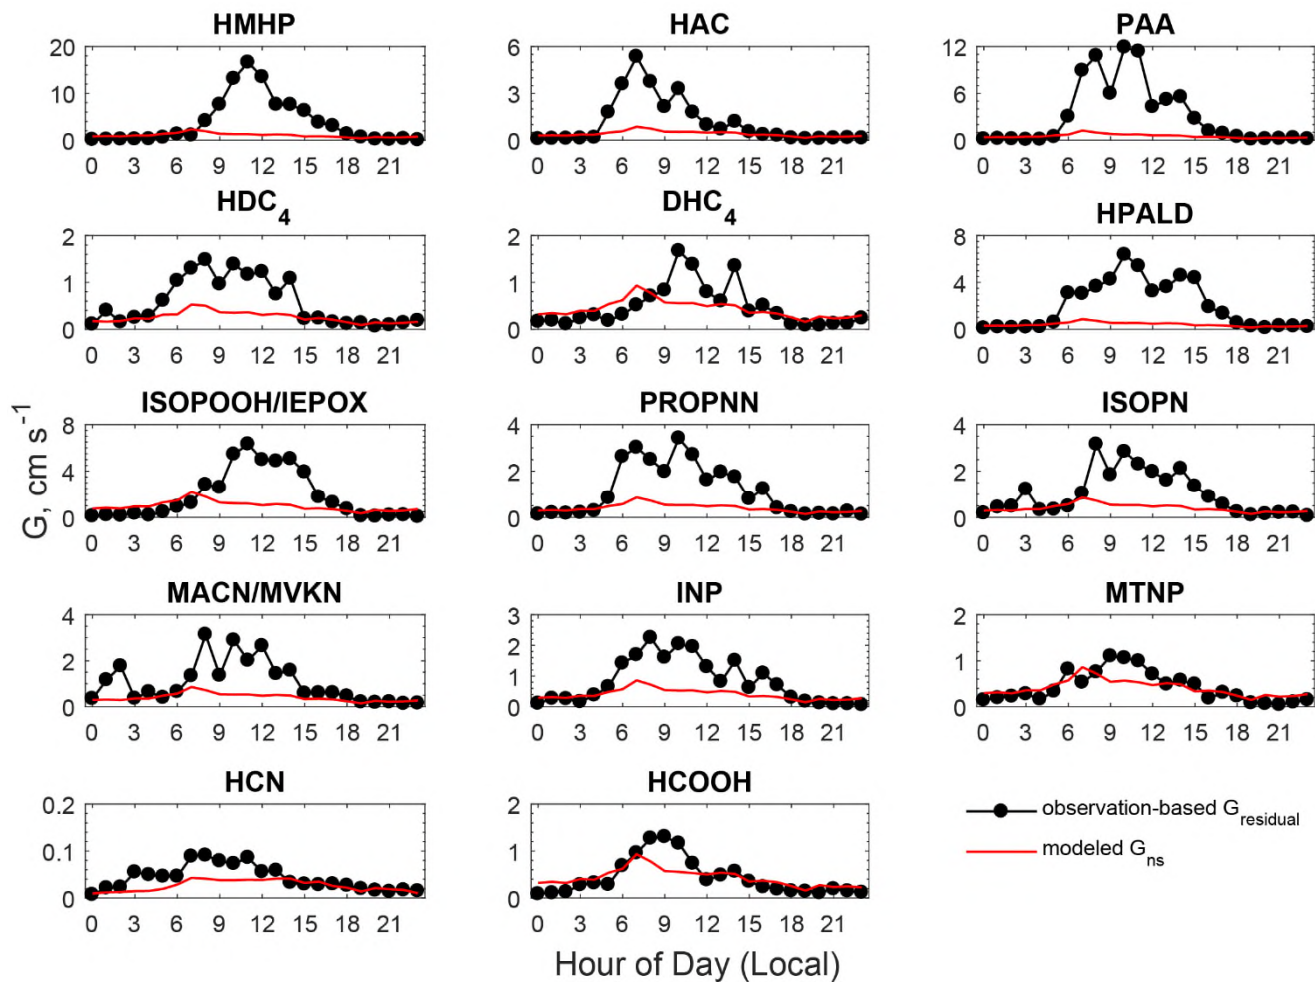

Figure S4. Comparison of averaged diel variations of the observation-based residual conductance ( $G_{residual}$ ) and the modeled non-stomatal conductance ( $G_{ns}$ ) of oVOCs and HCN.

## References:

- Chan, M.N., Surratt, J.D., Claeys, M., Edgerton, E.S., Tanner, R.L., Shaw, S.L., Zheng, M., Knipping, E.M., Eddingsaas, N.C., Wennberg, P.O. Seinfeld, J.H., 2010. Characterization and quantification of isoprene-derived epoxydiols in ambient aerosol in the southeastern United States. *Environmental Science & Technology*, 44(12), 4590-4596.
- Nguyen, T.B., Crouse, J.D., Teng, A.P., Clair, J.M.S., Paulot, F., Wolfe, G.M., Wennberg, P.O., 2015. Rapid deposition of oxidized biogenic compounds to a temperate forest. *Proceedings of the National Academy of Sciences*, 112, E392-E401.
- Reid, R.C., Prausnitz, J.M., Poling, B.E., 1987. The properties of gases and liquids, 4th Edition. McGraw-Hill, Inc., New York, 741 pp.
- Sander, R., 1999. Compilation of Henry's Law constants for inorganic and organic species of potential importance in environmental chemistry. Max-Planck Institute of Chemistry, Air Chemistry Dept., Mainz, Germany.
- Sander, R., 2015. Compilation of Henry's law constants (version 4.0) for water as solvent. *Atmospheric Chemistry & Physics*, 15(8), 4399-4981.
